# Supplementary material for: Synthesis and structural evolution of Pt nanotubular skeletons: revealing the source of the instability of nanostructured electrocatalysts
Source: Royal Society of Chemistry journal article supplement (doi:10.1039/c5ta01503k), 2015-01-01
Supplement: c5ta01503k1.pdf [file c5ta01503k1.pdf]

**Electronic supplementary information for**

**Synthesis and structural evolution of Pt nanotubular skeletons:  
revealing the source of instability for nanostructured  
electrocatalysts**

Rongyue Wang,<sup>1</sup> Drew C. Higgins,<sup>1</sup> Sagar Prabhudev,<sup>2</sup> DongUn Lee,<sup>1</sup> Ja-Yeon Choi,<sup>1</sup>  
Md Ariful Hoque,<sup>1</sup> Gianluigi Botton,<sup>2</sup> Zhongwei Chen<sup>1,\*</sup>

<sup>1</sup> Department of Chemical Engineering, Waterloo Institute for Nanotechnology, Waterloo  
Institute for Sustainable Energy, University of Waterloo, 200 University Avenue West,  
Waterloo, Ontario, N2L 3G1, Canada.

<sup>2</sup> Department of Materials Science and Engineering, McMaster University, Hamilton,  
Ontario, L8S 4L8, Canada.

\*Corresponding author: Telephone: 1-519-888-4567 ext. 38664

E-mail: [zhwchen@uwaterloo.ca](mailto:zhwchen@uwaterloo.ca)

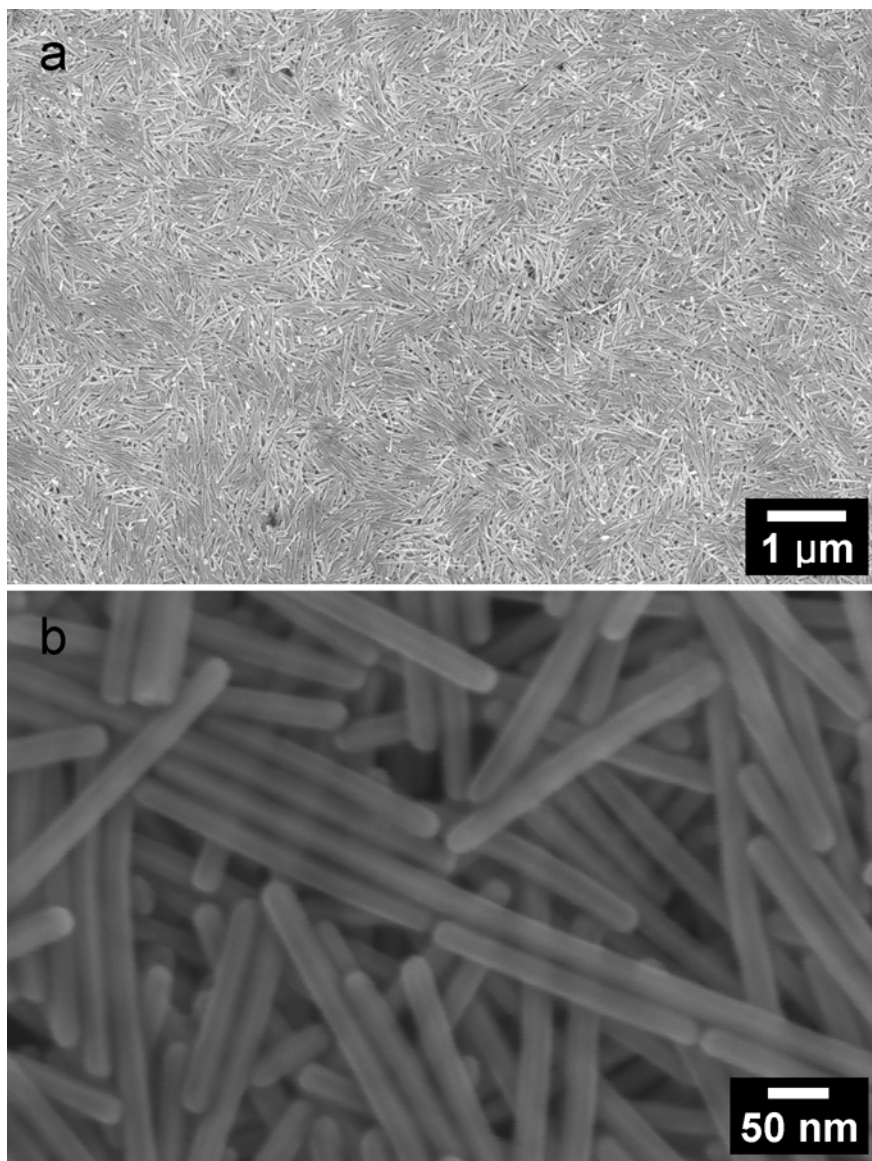

**Figure S1. SEM images of Pd nanowires.** a) Low magnification. b) High magnification.

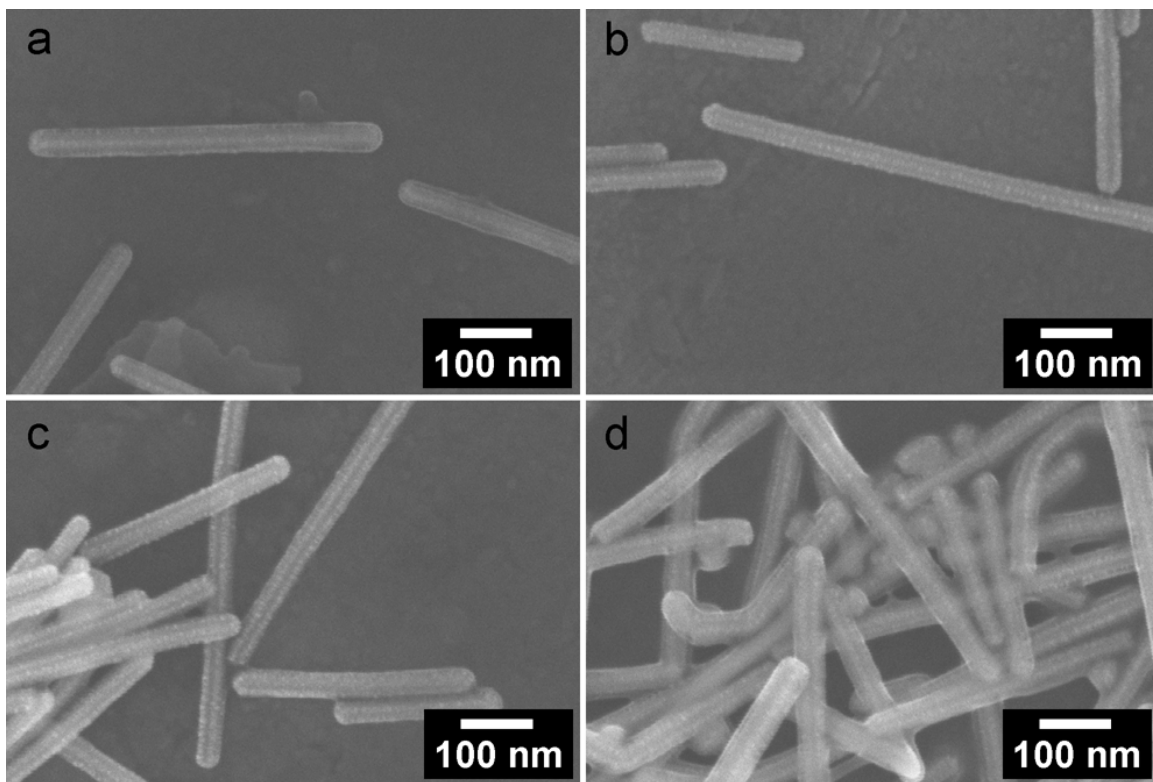

**Figure S2. SEM images of Pt coated Pd nanowires with different Pt loadings.** a) 5 mg  $\text{K}_2\text{PtCl}_4$ . b) 10 mg  $\text{K}_2\text{PtCl}_4$ . c) 20 mg  $\text{K}_2\text{PtCl}_4$ . d) 30 mg  $\text{K}_2\text{PtCl}_4$ .

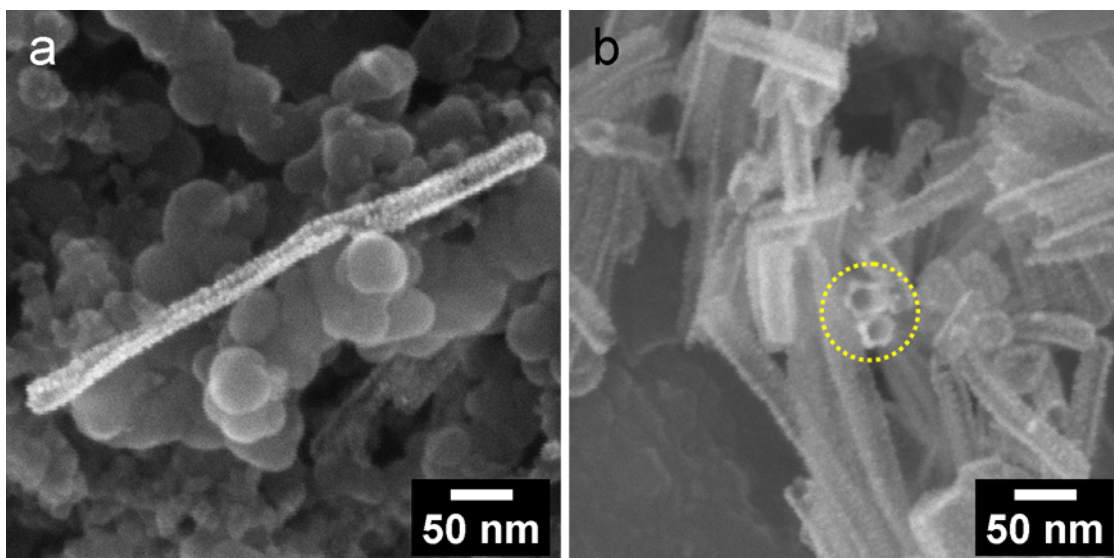

**Figure S3. SEM images of Pt nanotubes with different Pt loadings.** a) 10 mg  $\text{K}_2\text{PtCl}_4$  nanotubes mixed with carbon black. b) 20 mg  $\text{K}_2\text{PtCl}_4$  nanotubes. The cross sections of two broken nanotubes are highlighted by the dashed yellow circle in b.

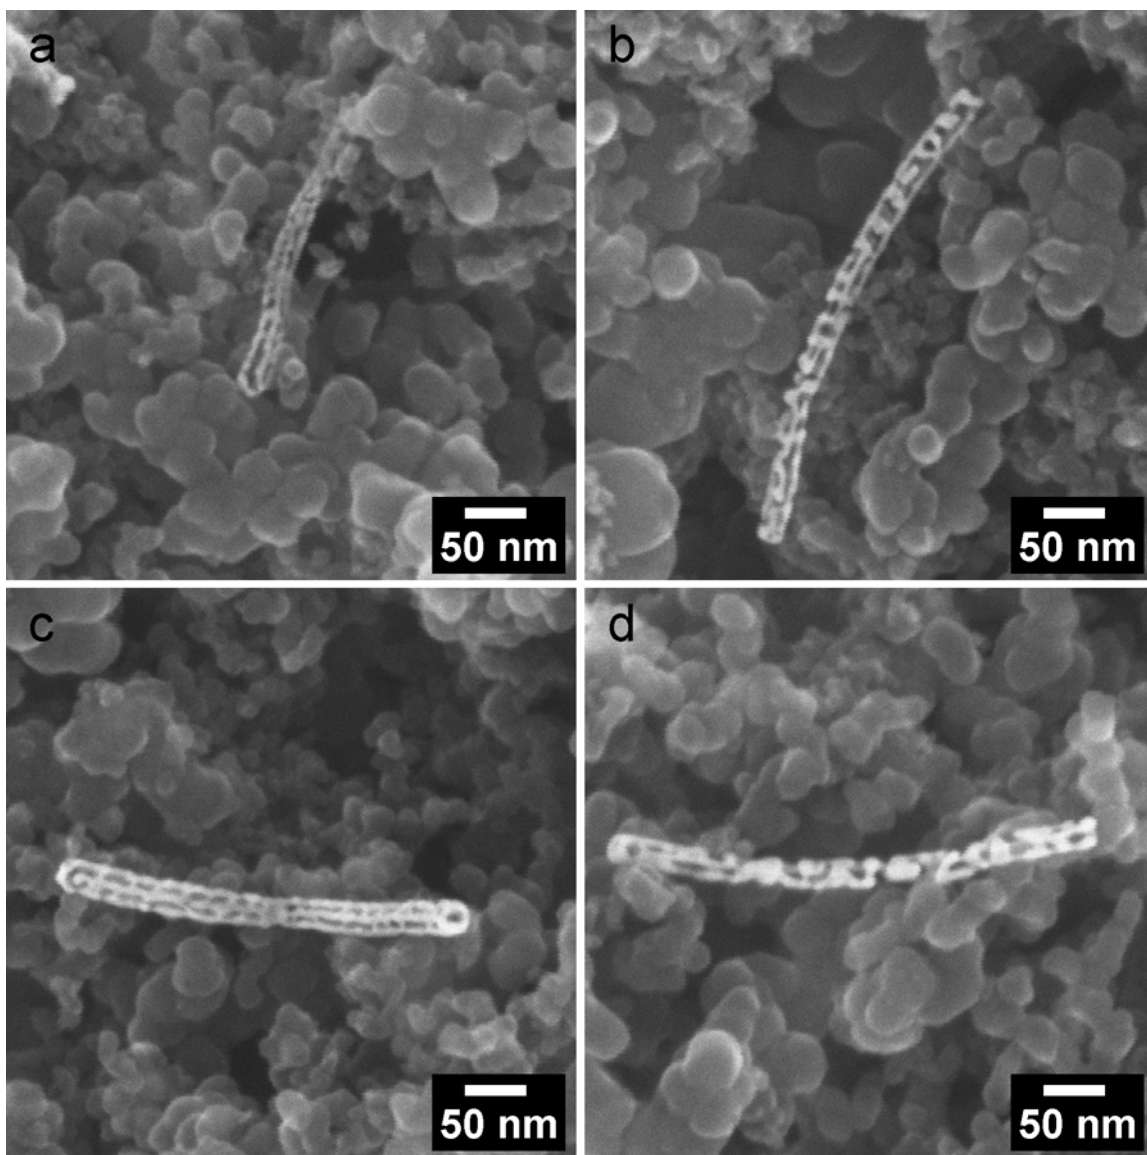

**Figure S4. SEM images of Pt nanotubular nanoskeletons obtained by annealing Pt nanotubes at 250 °C for 20 min. a) 5 mg  $\text{K}_2\text{PtCl}_4$ . b) 10 mg  $\text{K}_2\text{PtCl}_4$ . c) 20 mg  $\text{K}_2\text{PtCl}_4$ . d) 30 mg  $\text{K}_2\text{PtCl}_4$ .**

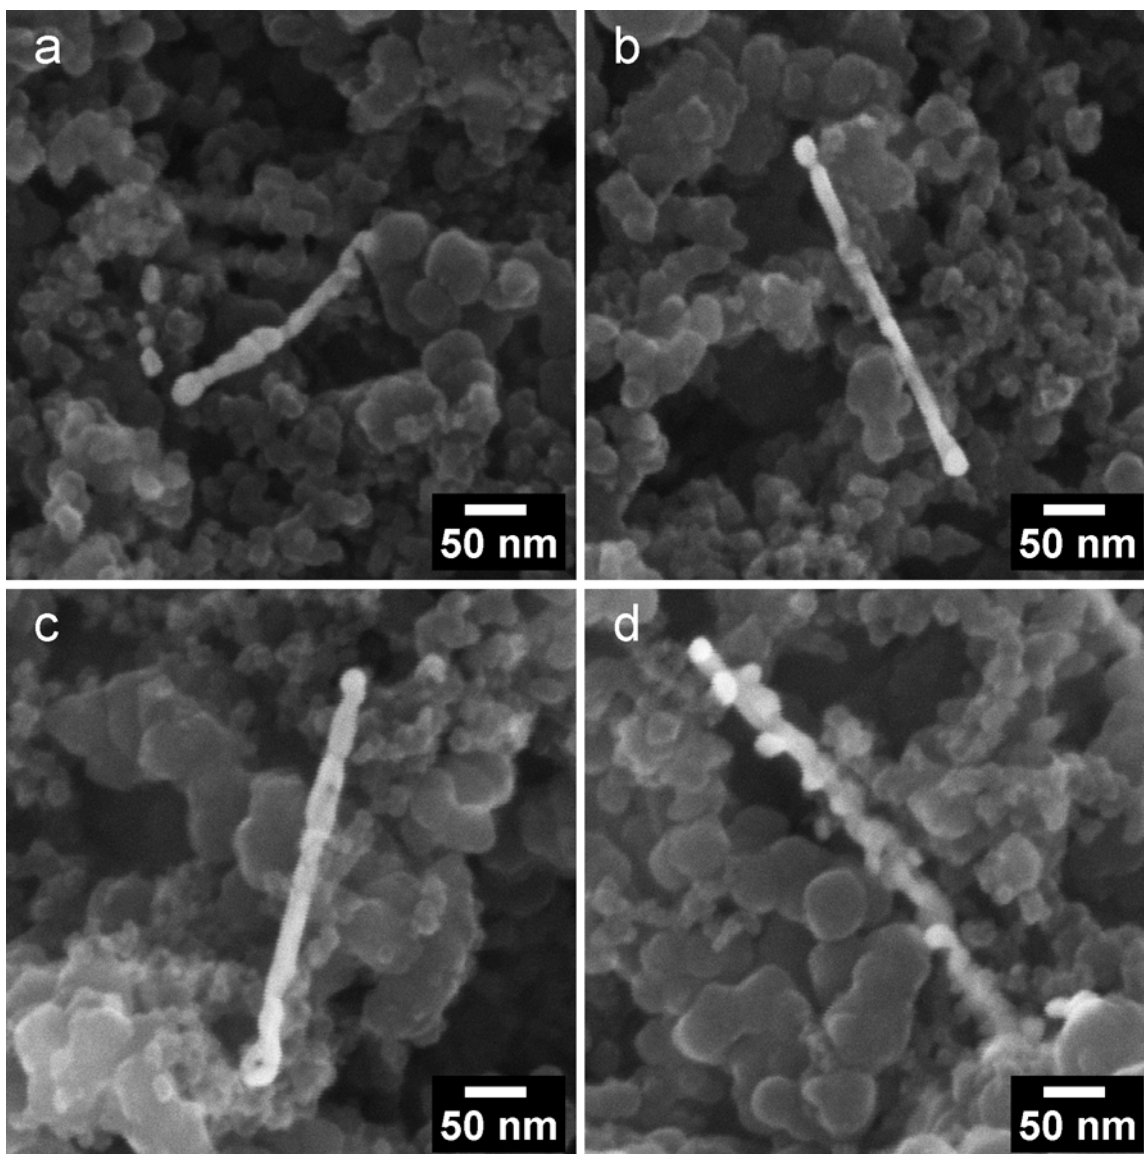

**Figure S5. SEM images of Pt nanowires obtained by annealing Pt nanotubes at 300 °C for 20 min. a) 5 mg K<sub>2</sub>PtCl<sub>4</sub>. b) 10 mg K<sub>2</sub>PtCl<sub>4</sub>. c) 20 mg K<sub>2</sub>PtCl<sub>4</sub>. d) 30 mg K<sub>2</sub>PtCl<sub>4</sub>.**
